# Supplementary material for: Preparation of polymer nanoparticle-based complex coacervate hydrogels using polymerisation-induced self-assembly derived nanogels
Source: Royal Society of Chemistry journal article supplement (doi:10.1039/d2sm01534j), 2023-01-01
Supplement: d2sm01534j1.pdf [file d2sm01534j1.pdf]

Electronic Supplementary information for:

## Preparation of polymer nanoparticle-based complex coacervate hydrogels using polymerisation-induced self- assembly derived nanogels

Ruiling Du,<sup>a,b</sup> Lee A. Fielding<sup>\*a,b</sup>

a. Department of Materials, School of Natural Sciences, University of Manchester, Oxford Road,  
Manchester, M13 9PL, UK.

b. Henry Royce Institute, The University of Manchester, Oxford Road, Manchester, M13 9PL, UK.

\* [lee.fielding@manchester.ac.uk](mailto:lee.fielding@manchester.ac.uk)

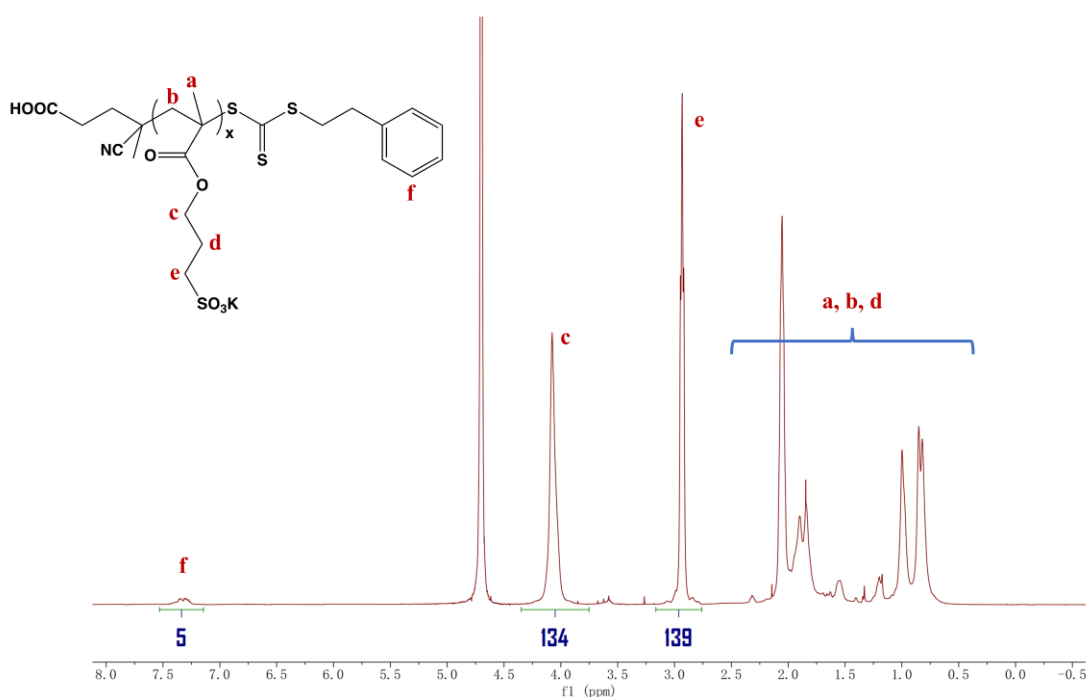

**Figure S1:** <sup>1</sup>H NMR spectra of a purified and freeze-dried PKSPMA<sub>68</sub> macro-CTA. The sample was dissolved in D<sub>2</sub>O prior to analysis. The degree of polymerisation for this macro-CTA was calculated by comparing the integrated proton signals corresponding to the methacrylic polymer backbone at 2.75-3.25 ppm and 3.75-4.3 ppm with that corresponding to the aromatic protons of the chain end at 7.2-7.4 ppm.

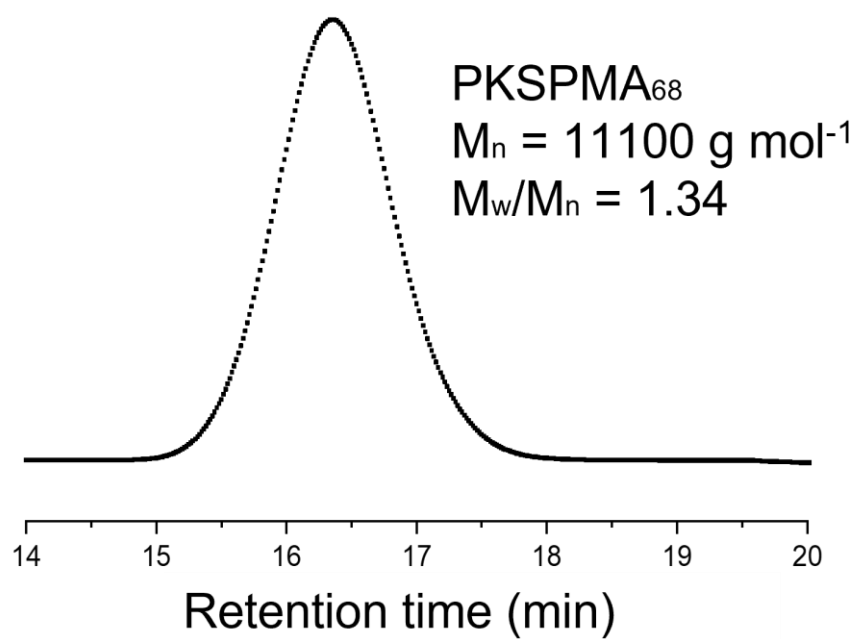

**Figure S2:** Aqueous gel permeation chromatography chromatograms obtained for PKSPMA<sub>68</sub> macro-CTA. A relatively narrow molecular weight distribution was achieved, suggesting successful RAFT polymerisation.

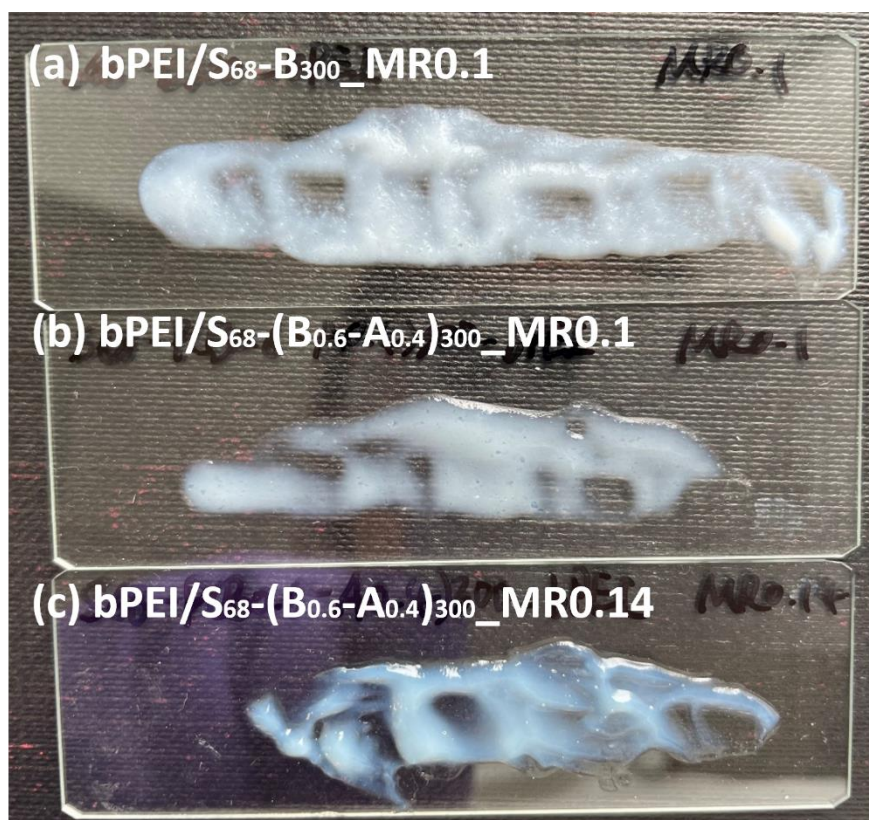

**Figure S3:** Images obtained for mixtures of branched polyethyleneimine and copolymer nanoparticles at different bPEI-to-NP mass ratios: (a) bPEI with  $\text{S}_{68}\text{-B}_{300}$  nanoparticles at MR 0.1; (b) bPEI with  $\text{S}_{68}\text{-P(B}_{0.6}\text{-A}_{0.4})_{300}$  nanoparticles at MR 0.1; (c) bPEI with  $\text{S}_{68}\text{-P(B}_{0.6}\text{-A}_{0.4})_{300}$  nanoparticles at MR 0.14.

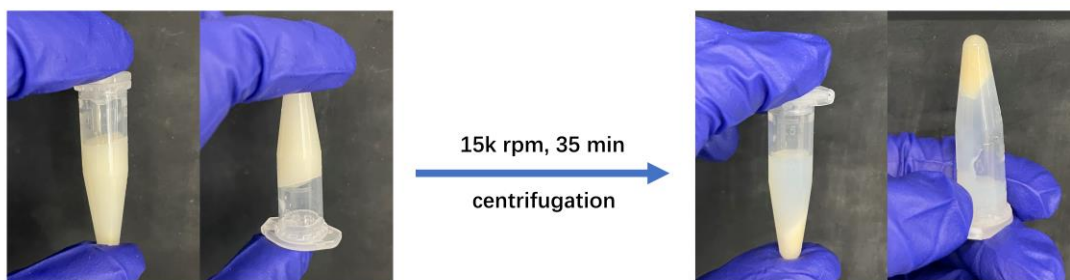

**Figure S4:** bPEI/S<sub>68</sub>-P(B<sub>0.6</sub>-A<sub>0.4</sub>)<sub>300</sub>\_MR 0.14 mixture before and after centrifugation (15k rpm for 35 min). Liquid-liquid phase separation occurs, with water being expelled from the gel, indicating complex coacervate formation.

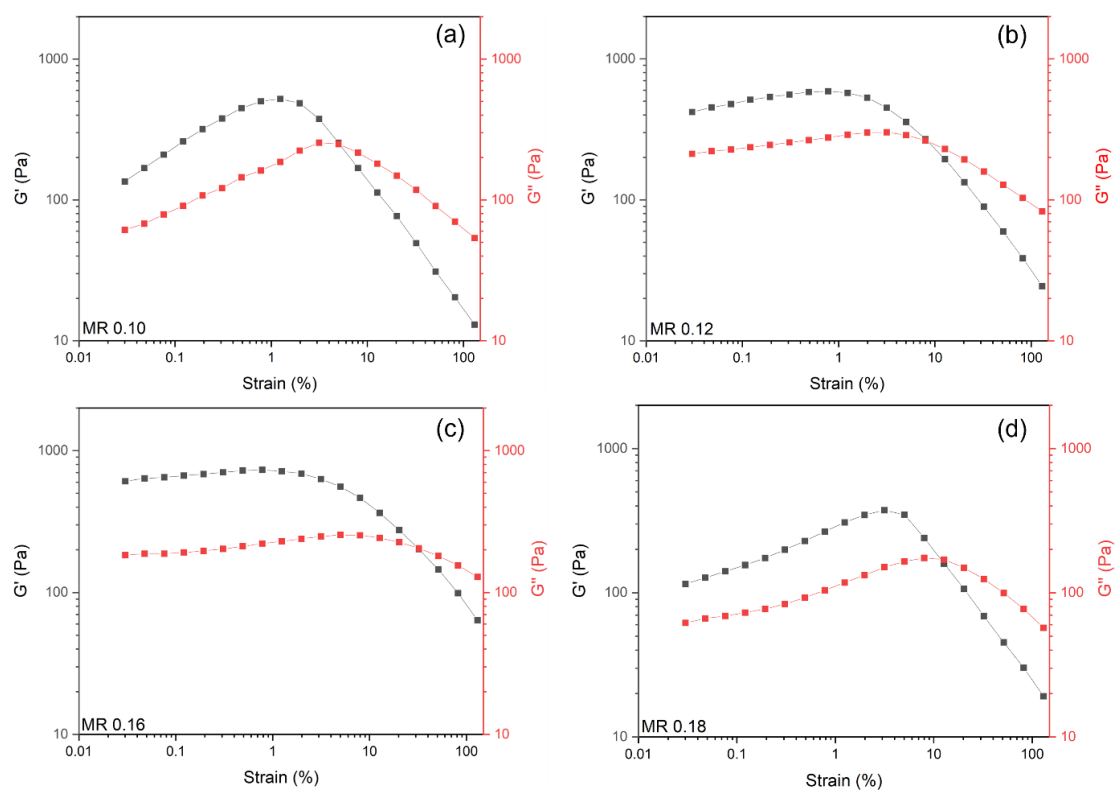

**Figure S5:** Strain-dependent oscillatory rheology measurements ( $\omega = 10 \text{ rad s}^{-1}$ ,  $25^\circ \text{C}$ ) of PEI/S<sub>68</sub>-P(B<sub>0.6</sub>-A<sub>0.4</sub>)<sub>300</sub> at different PEI-to-NP mass ratios; MR = (a) 0.10, (b) 0.12, (c) 0.16, (d) 0.18.

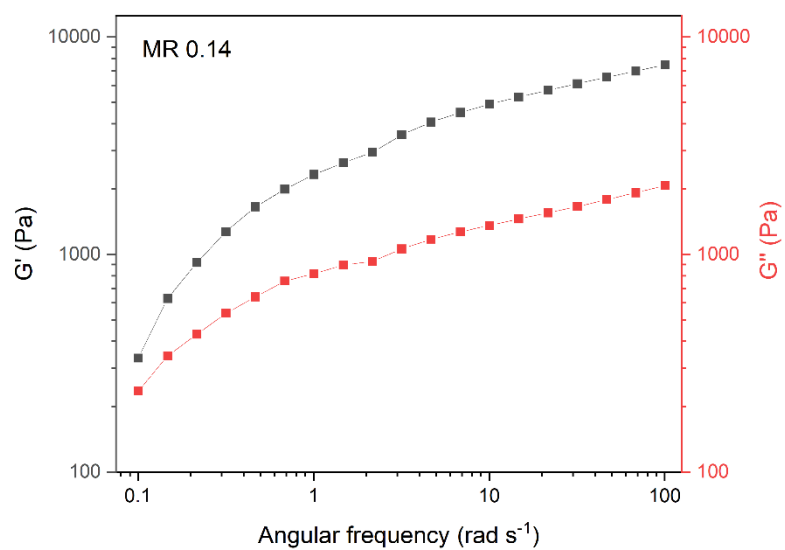

**Figure S6:** Angular frequency-dependent oscillatory rheology measurement ( $\epsilon = 0.2\%$ ,  $25\text{ }^{\circ}\text{C}$ ) of PEI/ $S_{68}$ - $P(B_{0.6}-A_{0.4})_{300}$  at a PEI-to-NP mass ratio of 0.14.

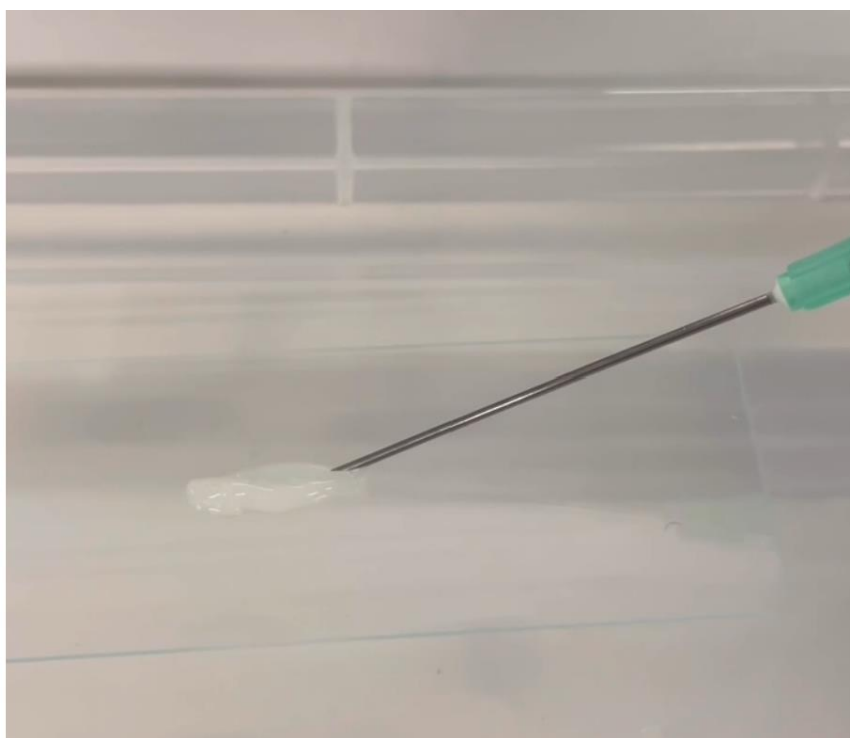

**Figure S7:** Photograph showing injectability of  $b\text{PEI}/S_{68}\text{-}P(B_{0.6}\text{-}A_{0.4})_{68\_MR0.14}$  hydrogel at room temperature.

**Table S1:** Particle diameters of S<sub>68</sub>-P(B<sub>m</sub>-A<sub>1-m</sub>)<sub>300</sub> nanoparticles at low pH and high pH. Particle diameters were measured by DLS and polydispersity index values are indicated in brackets.

| Nanoparticle composition                                               | Diameter at pH 2 / nm | Diameter at pH 10 / nm |
|------------------------------------------------------------------------|-----------------------|------------------------|
| S <sub>68</sub> -B <sub>300</sub>                                      | 54 (0.245)            | 51 (0.176)             |
| S <sub>68</sub> -P(B <sub>0.8</sub> -A <sub>0.2</sub> ) <sub>300</sub> | 53 (0.0994)           | 63 (0.0821)            |
| S <sub>68</sub> -P(B <sub>0.6</sub> -A <sub>0.4</sub> ) <sub>300</sub> | 51 (0.106)            | 84 (0.194)             |
| S <sub>68</sub> -P(B <sub>0.4</sub> -A <sub>0.6</sub> ) <sub>300</sub> | 111 (0.27)            | 112 (0.199)            |
| S <sub>68</sub> -P(B <sub>0.2</sub> -A <sub>0.8</sub> ) <sub>300</sub> | 256 (0.336)           | 150 (0.41)             |

### Synthesis of poly(potassium 3-sulfopropyl methacrylate) *via* RAFT solution polymerisation

KSPMA monomer (15.0 g, 60.9 mmol), PETTC RAFT agent (414 mg, ~1.2 mmol, dissolved in dioxane), ACVA (68 mg, 0.2 mmol, PETTC/ACVA molar ratio = 5), and pH 5.5 acetate buffer (65.5 g, final buffer/dioxane ratio = 3) were weighed into a round-bottomed flask, which was then sealed and purged with N<sub>2</sub> for 30 min. The sealed flask was placed in a preheated water bath at 70 °C for 90 min. The reaction was quenched by immersing the flask in an ice bath and opening it to air. The resulting PKSPMA macro-CTA (90.8 % conversion) was purified by dialysis against 10:1 water/methanol overnight. Then the purified solution was further dried under vacuum at 30 °C to evaporate volatiles and yield a yellow product (64.4 % yield). The degree of polymerisation (DP) was 68, as determined by <sup>1</sup>H-NMR using D<sub>2</sub>O (Figure S1). This value was higher than the theoretical DP of ~45. This difference can potentially be attributed to RAFT agent inefficiency and/or moisture present in this particular batch of in-house prepared PETTC. Nevertheless, aqueous GPC analysis indicated an M<sub>n</sub> of 11,100 g mol<sup>-1</sup> and an M<sub>w</sub>/M<sub>n</sub> of 1.34 (Figure S2).

### Procedure for determining (co)monomer conversion by gravimetry:

Monomer conversions were determined *via* gravimetry by drying approximately 0.1 g of the final dispersion at 120 °C until constant weight using a Kern DBS 60-3 Moisture Analyser. Conversions were calculated based on the measured solids content and the theoretical solids content at full monomer conversion using

$$\text{Conversion (\%)} = \left[ \frac{\text{Measured solids content (\%)}}{\text{Theoretical solids content at 100 \% monomer conversion (\%)}} \right] \times 100\%$$

$$\text{Theoretical solids content at 100 \% monomer conversion (\%)}$$

$$= \left[ \frac{\text{Total mass of reagents (g)}}{\text{Total mass of reagents and solvent (g)}} \right] \times 100\%$$
